# Supplementary material for: Integrating spatial and single-cell transcriptomics reveals tumor heterogeneity and intercellular networks in colorectal cancer
Source: PubMed Central journal article supplement (PMC11087651; doi:10.1038/s41419-024-06598-6), 2024-05-10

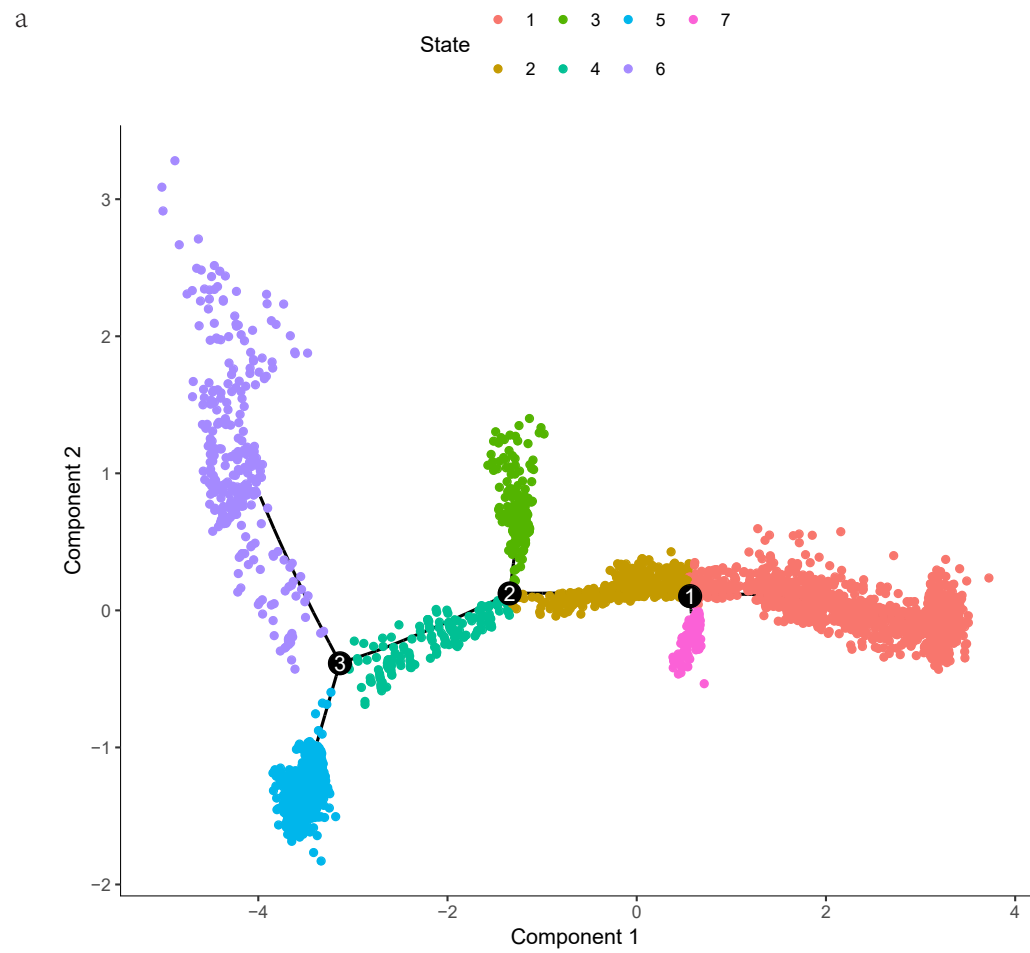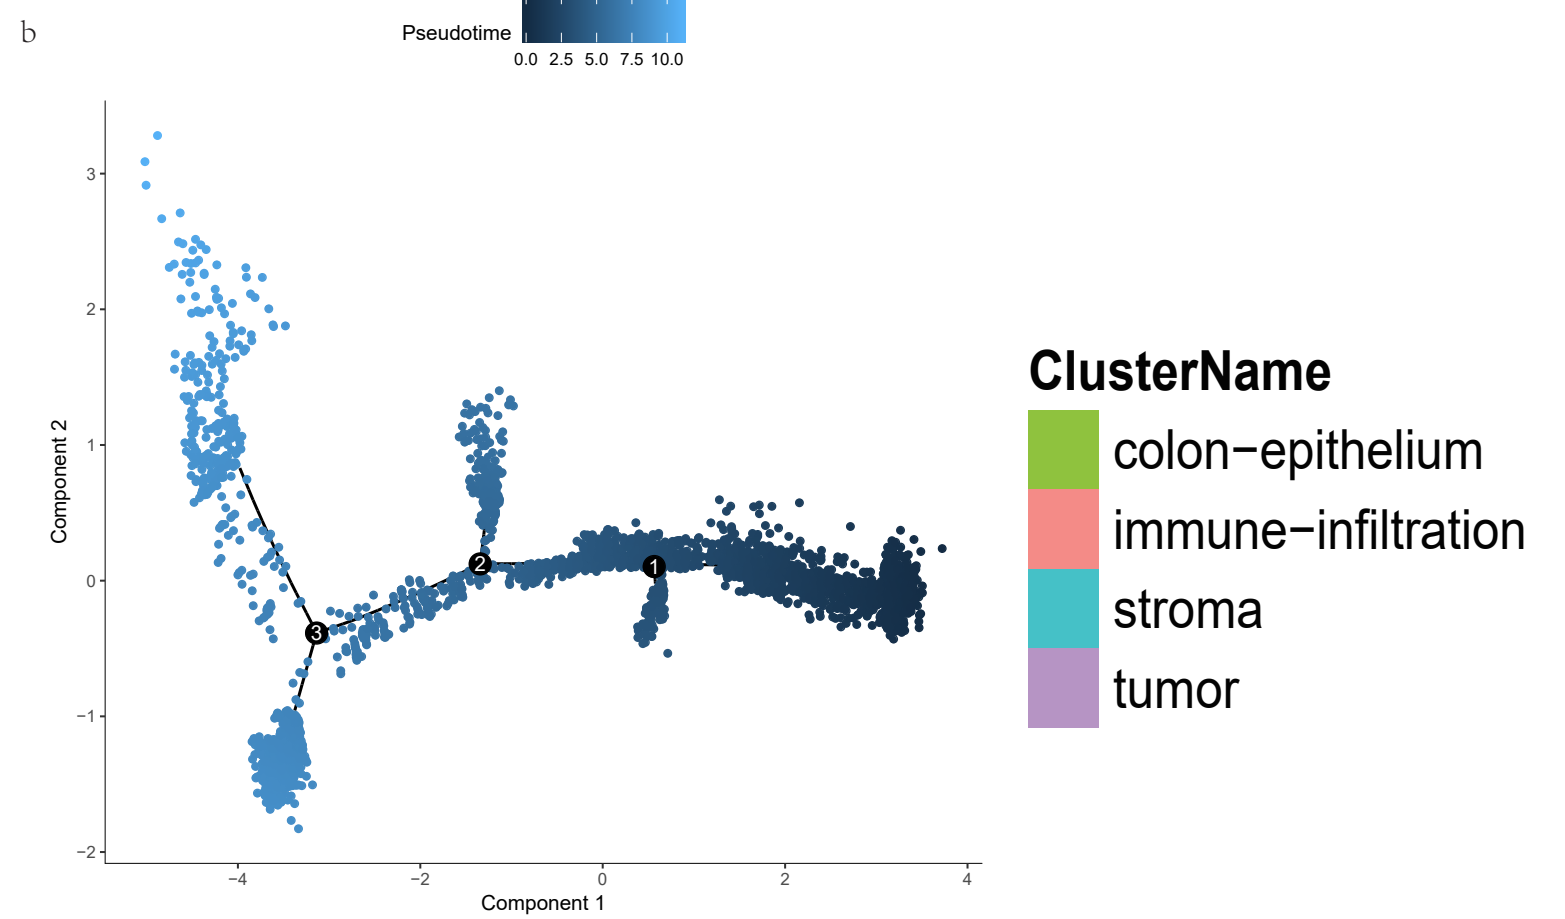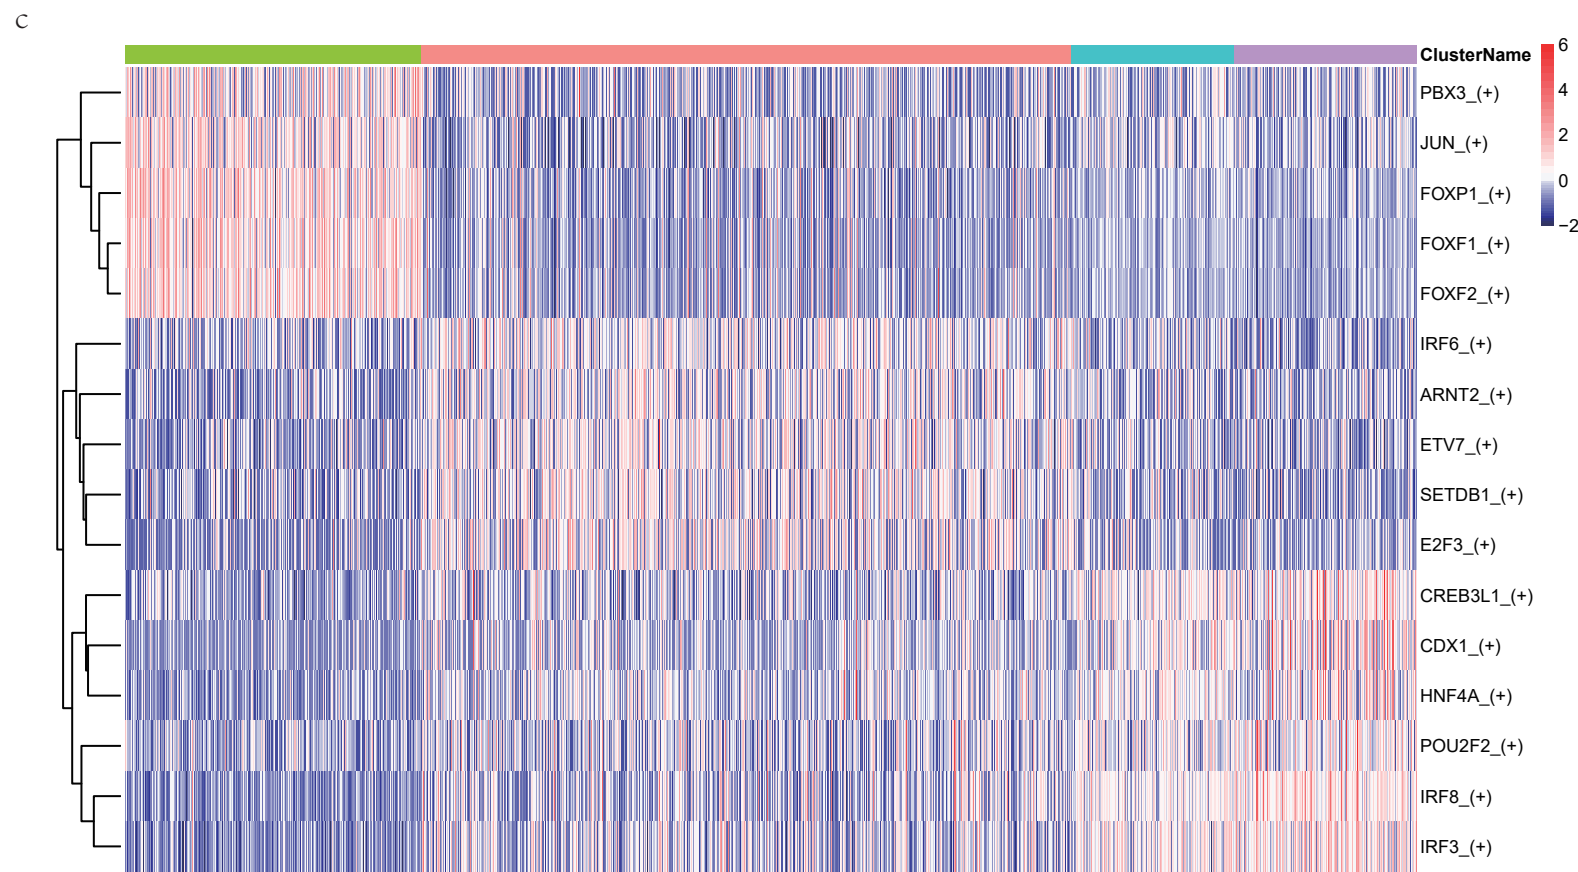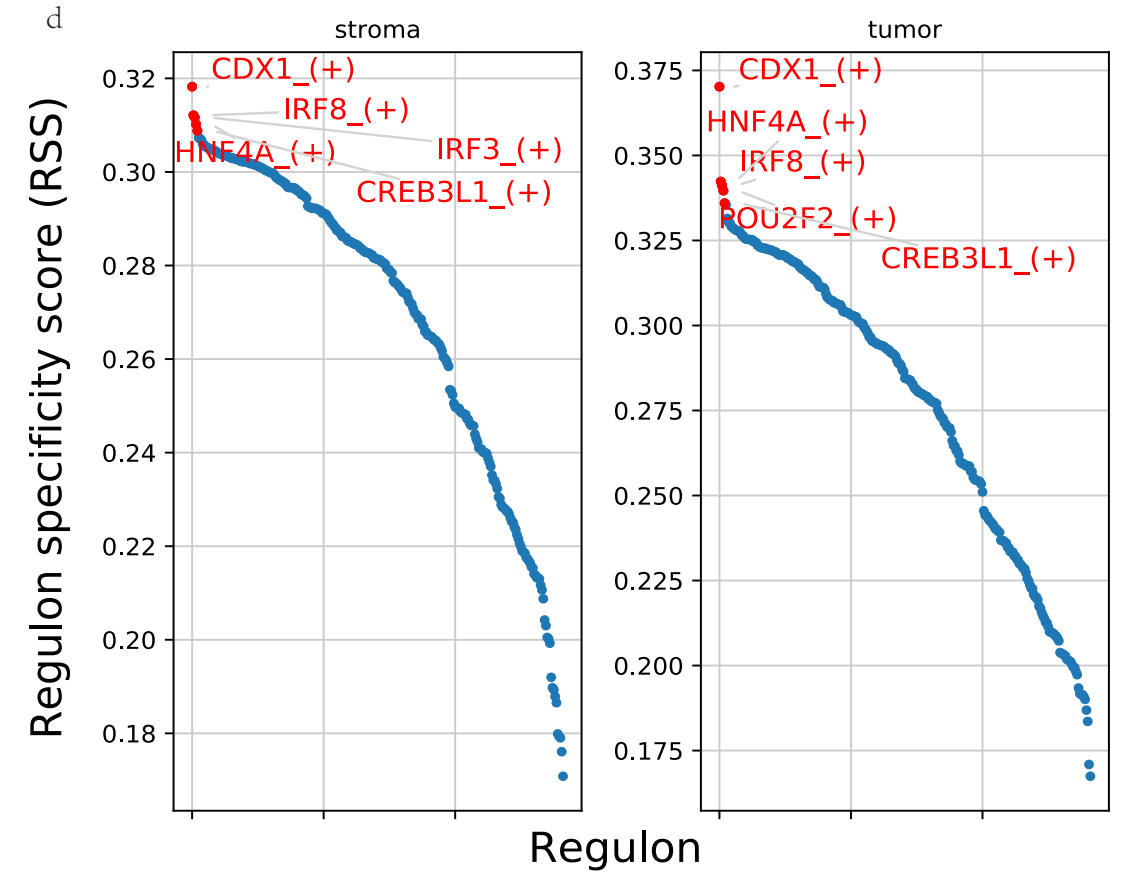

Supplement: 41419_2024_6598_MOESM5_ESM.pdf [file 41419_2024_6598_MOESM5_ESM.pdf]
